# Supplementary material for: Highly Expressing SCARA5 Promotes Proliferation and Migration of Esophageal Squamous Cell Carcinoma
Source: Hindawi journal article supplement (doi:10.1155/2022/2555647), 2022-06-17
Supplement: f1 [file 2555647.f1.pdf]

**Table S1 Downstream candidate genes of Thsd7a**

| <b>Target gene</b> | <b>Forward primer</b>  | <b>Reverse primer</b>    |
|--------------------|------------------------|--------------------------|
| CDC23              | CATGGCTGCAATAGCAAGAAAG | CGCCTCATTTTTCACTTGTCTT   |
| TBX3               | TGAACTCAACAGCCGCTCCTC  | CTTCCAAGCCGCTAACCAACC    |
| GGTLC1             | GCGTGAGCACTTAATGGCG    | GGCAGAGAAGAAGCTCGGAGG    |
| RAB22A             | TTTTGGCCGCTTTGTAGCAC   | CAGAAGCTTGGCAAACCACC     |
| CCDC117            | GGAGGGTTCTAGAAGGCGTG   | GCCACAGCTACTGCCAAAAC     |
| UHMK1              | TGTCTGCCTGGAAATAGC     | TGGGGATTCTTTTGAGC        |
| P3H1               | CGTGGGATTCTTTCAGGCA    | GAAAGGCAAACCAAGGGCG      |
| FAM81A             | ATTATCTGCACGGAGTTGGTTG | TGGCTCCACTGTTTTCTTAAC    |
| VAMP8              | TGAGCACTTCAAGACGACATC  | ACAATCACGCAGATAAGGACAA   |
| CETN2              | AGCGGACTCCTTTGGCTATG   | CCCTCATTGCCACCTTCAGT     |
| CORO1C             | GTGCCACATAACGATCAGGT   | CAAAATCACCACAGGTTTCAGTCA |
| STK26              | ATCTTGTGCAAACCCTGAGTTG | TTCAATCGCCTGATTCTGCT     |
| PKP3               | AAACCTGTCTCGGAACGCTAG  | CTGTCCCGCTTCTTCTTGATG    |
| RBM8A              | GTACCTAGTGTCTGAGCGGC   | TTGTGAATGCTCTCGTCCCC     |
| YRDC               | ACAGATACTGCCGTGTGAGAG  | GAGGCGTAAAAGGGTTTAGGTC   |
| MYDGF              | GCCGCATTTGAAAGGGAAAGT  | CAGCTCAGCTTTGAATGCC      |
| BEND6              | CAGAGAGACCCATATTCGGGA  | GGCTTTTTATTTGGCGCACAA    |
| SCARA5             | ATCTGCAATCTGCACCCTCC   | AACACGTGTATGGCCCAGTT     |
| CYB5B              | ATGTCCGGTTCAATGGCGAC   | CATGGATCACAAGCCACAGTT    |
| AGPS               | GCGCGAGCTACGGGTCT      | TTCTTTGGGATGGTGCCCGA     |
| CCDC86             | AGCGTCAGCAAGACCTACACC  | CCTCCTTATTCTGGGCCAACT    |
| GGT2               | CCCAACACTCAGCCTATTTCCA | CCTTCTGAACGGTGACCTG      |
| MGLL               | TCTCGGAATAAGACAGAGGTCG | ATGGAAGACGGAGTTGGTGAC    |
| WSB1               | GCCATTTTACTCCAGTGTCTC  | GGAATACGATGCGGACCCAA     |
| CSGALNACT1         | GAGGTGAATGCTGGCGTCAAG  | AAATCAGAGGCCGTGTAAGG     |
| STARD7             | GAGATGAAGCGGTTGGAAGAA  | ACTCGGTACTGGTAAAGGTGG    |
| LDLRAD3            | CAATGAGTGCAACATACCAGGC | ACTCTTGTCGAAGCAGTCAGG    |
| MOB1A              | GACTATTTGATGACTTGGGTTT | GTGCTGGTGATAAAATATGGG    |
| ADCK2              | CCTGTGTCCAGTTACCAGCA   | TTCCAGGGTGAAGGTCTGCAT    |
| TMOD3              | CCACCACAGGGCCATTTGATA  | TGTAGGGCACATAGTCTTCCC    |
| AGGF1              | GCAGCACAGGGGAAGTATGT   | ATCCGTGCCCTGTGAACTTT     |
| ABHD17C            | GGTCAGAGCATTGGGACTGT   | TCCTGGTATCCGGAAAAGCC     |
| DNAJC10            | GCAGGTTTACTGTTTCTCTG   | GGTCCAAGCGTGGTAACATGA    |
| PEF1               | CACTCCACCTCAGGAAAAGGA  | TGGCCATGGTATTCTGACG      |
| RAB3IP             | AAGTCGGAAGCAGCTCACAA   | TGCAGTTCGTCTCAACTCCC     |
| NCOA7              | GCACAGGCGAAACTTTTCTCT  | AGCCATAAAACCAAATCGTCCC   |
| SMCO4              | ACCTCCAAGGACAAGAAGGA   | AACACCACGATCAAGAGCAC     |
| GAPDH              | TGACTTCAACAGCGACACCCA  | CACCCTGTTGCTGTAGCCAAA    |
